# Supplementary material for: Propane dehydrogenation on an extra-framework and framework-embedded metal site within ZSM-5 zeolite from first-principles microkinetic simulations
Source: Royal Society of Chemistry journal article supplement (doi:10.1039/d4re00269e), 2024-01-01
Supplement: d4re00269e1.pdf [file d4re00269e1.pdf]

# Supplementary Information

## **Propane dehydrogenation on extra-framework and framework-embedded metal site within ZSM-5 zeolite from first-principles microkinetic simulations**

Yujue Du, Wende Hu, Yunlei Chen, Chuanming Wang,\* Weimin Yang\*

State Key Laboratory of Green Chemical Engineering and Industrial Catalysis,  
Sinopec Shanghai Research Institute of Petrochemical Technology Co. Ltd.,  
Shanghai 201208, China

\*E-Mail: [wangcm.sshy@sinopec.com](mailto:wangcm.sshy@sinopec.com), [yangwm.sshy@sinopec.com](mailto:yangwm.sshy@sinopec.com)

**Table S1.** The ZPE-corrected energies of PDH on three kinds of EF-MOH<sup>+</sup> and EF-M<sup>2+</sup> sites at 0 K. Unit: kJ/mol.

|    |      | Concerted pathway |     |     |     |     |     |     | Stepwise pathway |     |     |     |     |    |     |     |     |
|----|------|-------------------|-----|-----|-----|-----|-----|-----|------------------|-----|-----|-----|-----|----|-----|-----|-----|
|    |      | IS                | M1  | TS1 | M2  | TS2 | M3  | FS  | IS               | M1  | TS1 | M2  | TS2 | M3 | M4  | TS3 | FS  |
| EF | CuOH | 0                 | -57 | 19  | -55 | 125 | -8  | 100 | 0                | -57 | 19  | -55 | 26  | 24 | 78  | 144 | 100 |
|    | NiOH | 0                 | -61 | 45  | -15 | 144 | -16 | 100 | 0                | -61 | 45  | -15 | 58  | -3 | 49  | 132 | 100 |
|    | CoOH | 0                 | -55 | 51  | -18 | 146 | -28 | 100 | 0                | -55 | 51  | -18 | 91  | 38 | 90  | 160 | 100 |
|    | Cu   | 0                 | -60 | 46  | 32  | 149 | 9   | 100 | 0                | -60 | 46  | 32  | 76  | 61 | 154 | 166 | 100 |
|    | Ni   | 0                 | -74 | 61  | 56  | 145 | -33 | 100 | 0                | -74 | 61  | 56  | 101 | -5 | 164 | 165 | 100 |
|    | Co   | 0                 | -66 | 72  | 68  | 148 | -31 | 100 | 0                | -66 | 72  | 68  | 136 | 67 | 182 | 199 | 100 |

**Table S2.** The ZPE-corrected energies of PDH on three kinds of FE-MOH<sup>+</sup> and FE-M<sup>2+</sup> sites at 0 K. Unit: kJ/mol.

|    |      | Concerted pathway |     |     |     |     |     |     | Stepwise pathway |     |     |     |     |     |     |     |     |
|----|------|-------------------|-----|-----|-----|-----|-----|-----|------------------|-----|-----|-----|-----|-----|-----|-----|-----|
|    |      | IS                | M1  | TS1 | M2  | TS2 | M3  | FS  | IS               | M1  | TS1 | M2  | TS2 | M3  | M4  | TS3 | FS  |
| FE | CuOH | 0                 | -54 | -1  | -28 | 144 | 48  | 100 | 0                | -54 | -1  | -28 | 51  | 50  | 92  | 129 | 100 |
|    | NiOH | 0                 | -57 | 77  | 9   | 170 | 38  | 100 | 0                | -57 | 77  | 9   | 90  | 83  | 87  | 129 | 100 |
|    | CoOH | 0                 | -48 | 109 | 35  | 194 | 56  | 100 | 0                | -48 | 109 | 35  | 131 | 100 | 146 | 184 | 100 |
|    | Cu   | 0                 | -56 | 9   | -38 | 125 | -12 | 100 | 0                | -56 | 9   | -38 | 12  | -1  | 108 | 172 | 100 |
|    | Ni   | 0                 | -61 | 57  | 7   | 154 | 36  | 100 | 0                | -61 | 57  | 7   | 46  | 21  | 133 | 166 | 100 |
|    | Co   | 0                 | -56 | 87  | 53  | 165 | 22  | 100 | 0                | -56 | 87  | 53  | 111 | 49  | 154 | 191 | 100 |

**Table S3.** Reaction energies ( $\Delta E$ ) and energy barriers ( $E_a$ ) at 0 K, forward rate constants ( $k_{fwd}$ ) and backward rate constants ( $k_{bkd}$ ), as well as the degree of rate control ( $DRC$ ) at 853 K of the involved elementary steps of PDH reaction on four types of metal sites in ZSM-5.

|             | Type  | Elementary step                                                                   | $\Delta E /$<br>kJ/mol | $E_a /$<br>kJ/mol | $k_{fwd} /$<br>s <sup>-1</sup> | $k_{bkd} /$<br>s <sup>-1</sup> | $DRC$     |
|-------------|-------|-----------------------------------------------------------------------------------|------------------------|-------------------|--------------------------------|--------------------------------|-----------|
| EF-<br>CuOH | TS1   | C <sub>3</sub> H <sub>8</sub> * → C <sub>3</sub> H <sub>7</sub> H*                | 2                      | 76                | 3.84E+05                       | 8.29E+06                       | 8.85E-01  |
|             | TS2/C | C <sub>3</sub> H <sub>7</sub> H* → C <sub>3</sub> H <sub>6</sub> H <sub>2</sub> * | 47                     | 180               | 1.53E+01                       | 1.29E+01                       | 6.18E-04  |
|             | TS2/S | C <sub>3</sub> H <sub>7</sub> H* → C <sub>3</sub> H <sub>6</sub> HH*              | 79                     | 81                | 6.32E+07                       | 3.89E+10                       | 1.17E-01  |
|             | TS3   | HH* → H <sub>2</sub> *                                                            | 15                     | 66                | 3.35E+08                       | 3.53E+05                       | 1.30E-03  |
| EF-<br>NiOH | TS1   | C <sub>3</sub> H <sub>8</sub> * → C <sub>3</sub> H <sub>7</sub> H*                | 46                     | 106               | 6.31E+03                       | 6.93E+07                       | 1.11E-02  |
|             | TS2/C | C <sub>3</sub> H <sub>7</sub> H* → C <sub>3</sub> H <sub>6</sub> H <sub>2</sub> * | -1                     | 159               | 8.46E+01                       | 8.61E-02                       | 1.08E-04  |
|             | TS2/S | C <sub>3</sub> H <sub>7</sub> H* → C <sub>3</sub> H <sub>6</sub> HH*              | 12                     | 73                | 7.77E+05                       | 3.74E+04                       | 9.89E-01  |
|             | TS3   | HH* → H <sub>2</sub> *                                                            | 41                     | 83                | 3.75E+07                       | 1.40E+06                       | 2.71E-08  |
| EF-<br>CoOH | TS1   | C <sub>3</sub> H <sub>8</sub> * → C <sub>3</sub> H <sub>7</sub> H*                | 37                     | 106               | 5.89E+03                       | 1.93E+07                       | -5.80E-03 |
|             | TS2/C | C <sub>3</sub> H <sub>7</sub> H* → C <sub>3</sub> H <sub>6</sub> H <sub>2</sub> * | -10                    | 164               | 9.71E+01                       | 2.87E-02                       | -2.12E-03 |
|             | TS2/S | C <sub>3</sub> H <sub>7</sub> H* → C <sub>3</sub> H <sub>6</sub> HH*              | 56                     | 109               | 3.68E+04                       | 8.29E+05                       | 9.90E-01  |
|             | TS3   | HH* → H <sub>2</sub> *                                                            | 4                      | 70                | 2.17E+08                       | 4.40E+04                       | -1.11E-02 |
| EF-<br>Cu   | TS1   | C <sub>3</sub> H <sub>8</sub> * → C <sub>3</sub> H <sub>7</sub> H*                | 92                     | 106               | 8.14E+03                       | 4.83E+10                       | 1.35E-01  |
|             | TS2/C | C <sub>3</sub> H <sub>7</sub> H* → C <sub>3</sub> H <sub>6</sub> H <sub>2</sub> * | -23                    | 117               | 1.60E+04                       | 5.87E+00                       | 1.84E-06  |
|             | TS2/S | C <sub>3</sub> H <sub>7</sub> H* → C <sub>3</sub> H <sub>6</sub> HH*              | 29                     | 44                | 8.16E+09                       | 1.51E+12                       | 7.97E-01  |
|             | TS3   | HH* → H <sub>2</sub> *                                                            | -64                    | 12                | 8.61E+10                       | 8.13E+05                       | 2.24E-10  |
| EF-Ni       | TS1   | C <sub>3</sub> H <sub>8</sub> * → C <sub>3</sub> H <sub>7</sub> H*                | 130                    | 135               | 1.25E+02                       | 1.71E+11                       | 1.02E-02  |
|             | TS2/C | C <sub>3</sub> H <sub>7</sub> H* → C <sub>3</sub> H <sub>6</sub> H <sub>2</sub> * | -89                    | 91                | 3.49E+05                       | 1.23E-02                       | 4.79E-03  |
|             | TS2/S | C <sub>3</sub> H <sub>7</sub> H* → C <sub>3</sub> H <sub>6</sub> HH*              | -61                    | 45                | 6.07E+08                       | 3.46E+05                       | 1.00E+00  |
|             | TS3   | HH* → H <sub>2</sub> *                                                            | -77                    | 1                 | 4.35E+11                       | 7.00E+05                       | 1.11E-02  |
| EF-Co       | TS1   | C <sub>3</sub> H <sub>8</sub> * → C <sub>3</sub> H <sub>7</sub> H*                | 133                    | 138               | 8.77E+01                       | 1.88E+11                       | 6.34E-03  |
|             | TS2/C | C <sub>3</sub> H <sub>7</sub> H* → C <sub>3</sub> H <sub>6</sub> H <sub>2</sub> * | -99                    | 80                | 8.60E+05                       | 7.68E-03                       | 4.04E-02  |
|             | TS2/S | C <sub>3</sub> H <sub>7</sub> H* → C <sub>3</sub> H <sub>6</sub> HH*              | 5                      | 68                | 2.29E+07                       | 6.09E+07                       | 9.68E-01  |
|             | TS3   | HH* → H <sub>2</sub> *                                                            | -95                    | 17                | 4.13E+10                       | 4.75E+03                       | 1.11E-02  |
| FE-<br>CuOH | TS1   | C <sub>3</sub> H <sub>8</sub> * → C <sub>3</sub> H <sub>7</sub> H*                | 26                     | 53                | 2.92E+07                       | 9.22E+09                       | 7.26E-03  |
|             | TS2/C | C <sub>3</sub> H <sub>7</sub> H* → C <sub>3</sub> H <sub>6</sub> H <sub>2</sub> * | 76                     | 172               | 2.21E+03                       | 2.45E+04                       | 3.25E-05  |
|             | TS2/S | C <sub>3</sub> H <sub>7</sub> H* → C <sub>3</sub> H <sub>6</sub> HH*              | 78                     | 79                | 6.76E+07                       | 6.26E+10                       | 9.89E-01  |
|             | TS3   | HH* → H <sub>2</sub> *                                                            | -9                     | 37                | 4.44E+09                       | 5.66E+05                       | 3.87E-08  |
| FE-<br>NiOH | TS1   | C <sub>3</sub> H <sub>8</sub> * → C <sub>3</sub> H <sub>7</sub> H*                | 66                     | 134               | 3.80E+02                       | 2.96E+07                       | 9.21E-01  |
|             | TS2/C | C <sub>3</sub> H <sub>7</sub> H* → C <sub>3</sub> H <sub>6</sub> H <sub>2</sub> * | 29                     | 161               | 5.78E+02                       | 9.09E+00                       | 1.31E-07  |
|             | TS2/S | C <sub>3</sub> H <sub>7</sub> H* → C <sub>3</sub> H <sub>6</sub> HH*              | 74                     | 81                | 3.49E+08                       | 1.37E+11                       | 7.81E-02  |
|             | TS3   | HH* → H <sub>2</sub> *                                                            | 1                      | 42                | 2.07E+09                       | 1.15E+06                       | 1.97E-10  |
| FE-<br>CoOH | TS1   | C <sub>3</sub> H <sub>8</sub> * → C <sub>3</sub> H <sub>7</sub> H*                | 84                     | 157               | 1.15E+01                       | 1.19E+07                       | 8.68E-01  |
|             | TS2/C | C <sub>3</sub> H <sub>7</sub> H* → C <sub>3</sub> H <sub>6</sub> H <sub>2</sub> * | 21                     | 159               | 2.80E+02                       | 1.35E+00                       | 4.75E-07  |
|             | TS2/S | C <sub>3</sub> H <sub>7</sub> H* → C <sub>3</sub> H <sub>6</sub> HH*              | 65                     | 96                | 7.79E+07                       | 8.30E+09                       | 1.32E-01  |
|             | TS3   | HH* → H <sub>2</sub> *                                                            | -57                    | 38                | 3.88E+09                       | 6.29E+02                       | 9.53E-13  |

|              |              |                                     |     |     |          |          |           |
|--------------|--------------|-------------------------------------|-----|-----|----------|----------|-----------|
| <b>FE-Cu</b> | <b>TS1</b>   | $C_3H_8^* \rightarrow C_3H_7H^*$    | 18  | 65  | 2.57E+07 | 1.27E+09 | 4.61E-01  |
|              | <b>TS2/C</b> | $C_3H_7H^* \rightarrow C_3H_6H_2^*$ | 26  | 163 | 3.32E+02 | 3.45E-01 | -2.31E-03 |
|              | <b>TS2/S</b> | $C_3H_7H^* \rightarrow C_3H_6HH^*$  | 37  | 50  | 1.13E+09 | 3.64E+11 | 5.20E-01  |
|              | <b>TS3</b>   | $HH^* \rightarrow H_2^*$            | -17 | 64  | 2.33E+08 | 2.97E+04 | -5.50E-03 |
| <b>FE-Ni</b> | <b>TS1</b>   | $C_3H_8^* \rightarrow C_3H_7H^*$    | 68  | 118 | 1.61E+04 | 8.22E+08 | 6.27E-01  |
|              | <b>TS2/C</b> | $C_3H_7H^* \rightarrow C_3H_6H_2^*$ | 29  | 147 | 1.84E+03 | 3.72E+00 | 4.96E-07  |
|              | <b>TS2/S</b> | $C_3H_7H^* \rightarrow C_3H_6HH^*$  | 14  | 39  | 1.39E+09 | 9.30E+10 | 3.71E-01  |
|              | <b>TS3</b>   | $HH^* \rightarrow H_2^*$            | -41 | 33  | 1.99E+10 | 7.70E+04 | 8.55E-10  |
| <b>FE-Co</b> | <b>TS1</b>   | $C_3H_8^* \rightarrow C_3H_7H^*$    | 109 | 143 | 4.50E+02 | 8.30E+09 | 7.36E-03  |
|              | <b>TS2/C</b> | $C_3H_7H^* \rightarrow C_3H_6H_2^*$ | -31 | 112 | 1.64E+05 | 6.14E-02 | -4.50E-03 |
|              | <b>TS2/S</b> | $C_3H_7H^* \rightarrow C_3H_6HH^*$  | -4  | 58  | 1.29E+08 | 4.37E+08 | 9.76E-01  |
|              | <b>TS3</b>   | $HH^* \rightarrow H_2^*$            | -63 | 37  | 1.19E+10 | 2.21E+03 | -1.66E-02 |

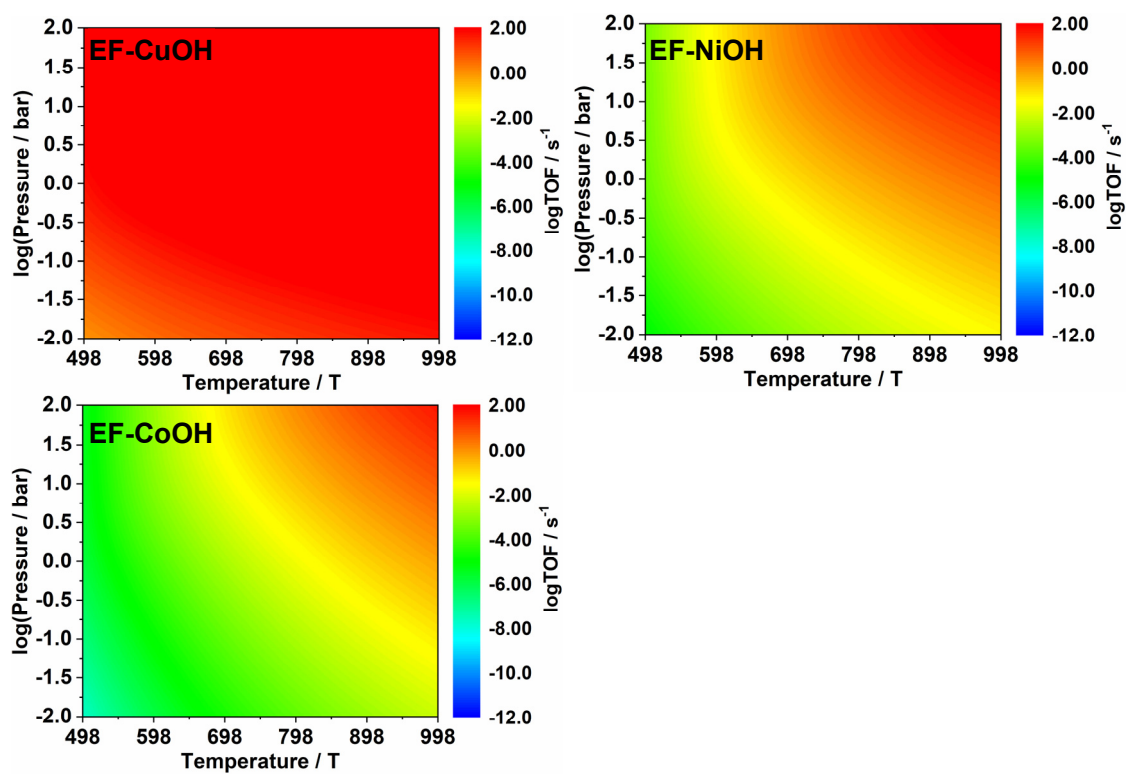

**Figure S1.** Activity plots of PDH on three kinds of EF-MOH<sup>+</sup> sites as a function of temperature and pressure.

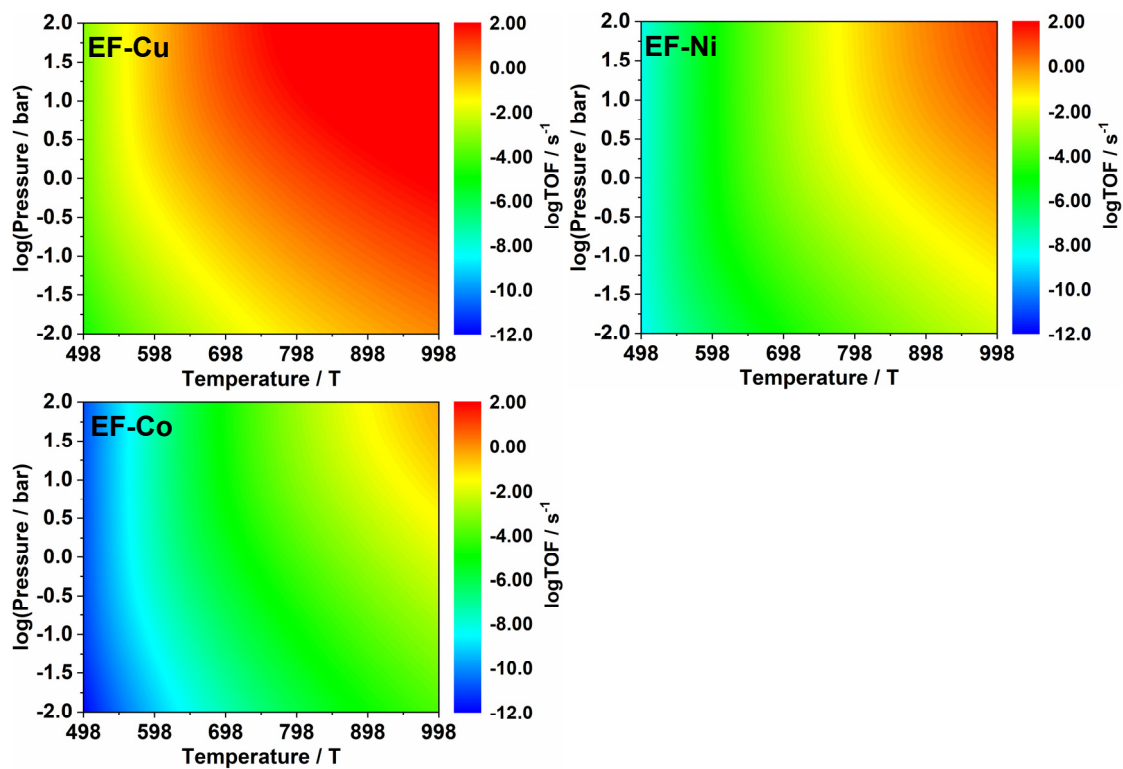

**Figure S2.** Activity plots of PDH on three kinds of EF-M<sup>2+</sup> sites as a function of temperature and pressure.

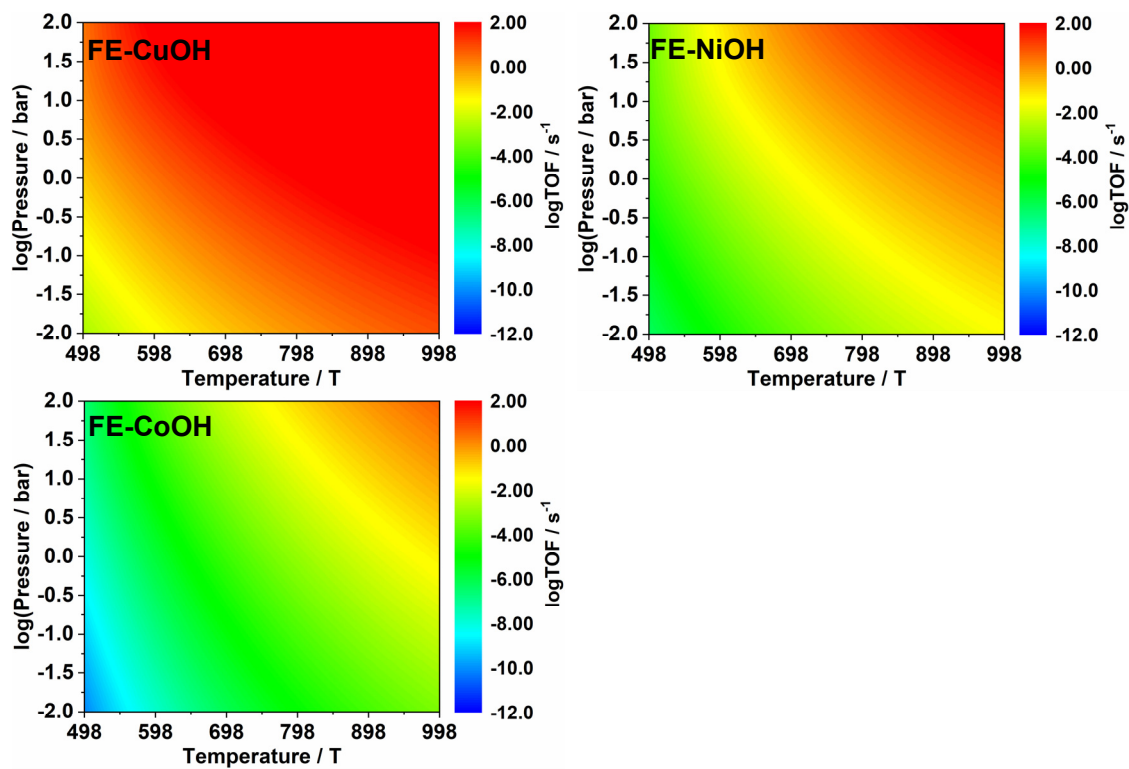

**Figure S3.** Activity plots of PDH on three kinds of FE-MOH<sup>+</sup> sites as a function of temperature and pressure.

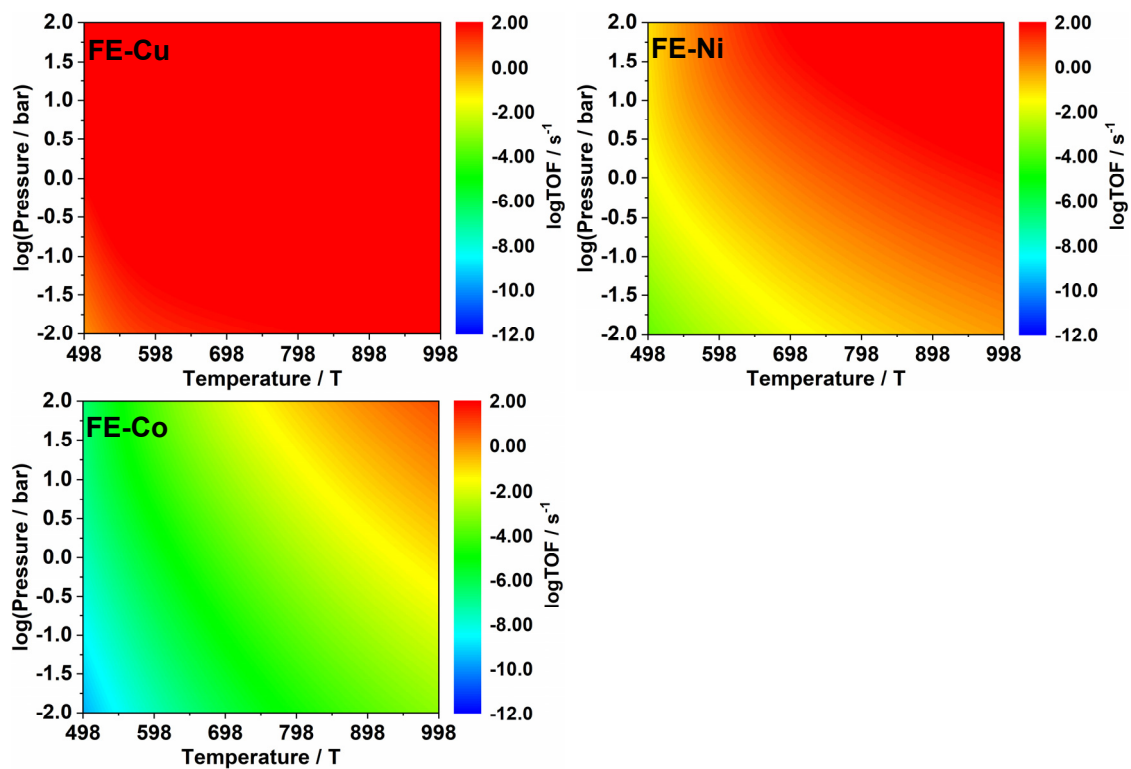

**Figure S4.** Activity plots of PDH on three kinds of FE-M<sup>2+</sup> sites as a function of temperature and pressure.
